# Supplementary material for: Human Impacts Flatten Rainforest-Savanna Gradient and Reduce Adaptive Diversity in a Rainforest Bird
Source: PubMed Central journal article supplement (PMC2948002; doi:10.1371/journal.pone.0013088), 2010-09-30
Supplement: pone.0013088.s002.pdf [file pone.0013088.s002.pdf]

**Table S1.** Weighted least-squares regressions of morphological traits on percent tree cover.

| Trait                                   | $r^2$                     | +/- * | $p^\dagger$           | $n$ (observations) <sup>‡</sup> |
|-----------------------------------------|---------------------------|-------|-----------------------|---------------------------------|
| PC1                                     | 0.51                      | –     | <b>0.0009</b>         | 18 (125)                        |
| PC2                                     | 0.01                      | –     | 0.68                  | 18 (125)                        |
| Tarsus length (mm) <sup>§</sup>         | 0.39                      | –     | <b>0.006</b>          | 18 (128)                        |
| Wing length (mm) <sup>¶</sup>           | 0.48 (0.32) <sup>  </sup> | –     | <b>0.0015 (0.015)</b> | 18 (128)                        |
| Tail length (mm) <sup>¶</sup>           | 0.57 (0.45) <sup>  </sup> | –     | <b>0.0004 (0.002)</b> | 18 (125)                        |
| Upper mandible length (mm) <sup>§</sup> | 0.04                      |       | 0.41                  | 18 (128)                        |

\* Indicates the slope of the regression, where significant, between morphology and tree cover.

† Boldface indicates significance.

‡ Number of populations, with parentheses indicating the total number of individuals.

§ Regressions of log-transformed trait values on log-transformed percent tree cover.

¶ Regressions use residuals from linear regressions of log-transformed trait values on log-transformed tarsus length, which are then regressed on percent tree cover.

|| Parentheses indicate results for traits corrected for size using tarsus length.
