# Supplementary material for: Human Impacts Flatten Rainforest-Savanna Gradient and Reduce Adaptive Diversity in a Rainforest Bird
Source: PubMed Central journal article supplement (PMC2948002; doi:10.1371/journal.pone.0013088), 2010-09-30
Supplement: pone.0013088.s003.pdf [file pone.0013088.s003.pdf]

**Table S2.** Coordinates, habitat classification, percent tree cover, and sample sizes for *A. virens* captured and measured by TBS in West and Central Africa.

| <b>Site</b>          | <b>Latitude</b> | <b>Longitude</b> | <b>Country</b>    | <b>Habitat</b> | <b>% Tree Cover</b> | <b><i>n</i></b> |
|----------------------|-----------------|------------------|-------------------|----------------|---------------------|-----------------|
| 1. Paule Oula        | 5.826°N         | 7.391°W          | Ivory Coast       | Forest         | 49.6                | 4               |
| 2. Lamto             | 6.216°N         | 5.027°W          | Ivory Coast       | Ecotone        | 19.7                | 9               |
| 3. Marahoue          | 7.028°N         | 5.948°W          | Ivory Coast       | Ecotone        | 24.9                | 2               |
| 4. CSRS              | 5.331°N         | 4.129°W          | Ivory Coast       | Forest         | 13.7                | 5               |
| 5. Bioko*            | 3.743°N         | 8.721°E          | Equatorial Guinea | Forest         | 64.4                | 7               |
| 6. Elende            | 2.216°N         | 9.793°E          | Equatorial Guinea | Forest         | 69.1                | 10              |
| 7. Kribi             | 2.731°N         | 9.872°E          | Cameroon          | Forest         | 77.7                | 4               |
| 8. Sakbayeme         | 4.038°N         | 10.574°E         | Cameroon          | Forest         | 56.5                | 16              |
| 9. Nkwouak           | 3.870°N         | 13.316°E         | Cameroon          | Forest         | 74.0                | 8               |
| 10. Zobefame         | 2.659°N         | 13.397°E         | Cameroon          | Forest         | 79.1                | 3               |
| 11. Lac Lobeke       | 2.311°N         | 15.762°E         | Cameroon          | Forest         | 79.5                | 5               |
| 12. Tchabal Mbabo*   | 7.252°N         | 12.058°E         | Cameroon          | Montane        | 33.6                | 4               |
| 13. Tchabal Gandaba* | 7.743°N         | 12.716°E         | Cameroon          | Montane        | 30.9                | 14              |
| 14. Tibati           | 6.504°N         | 12.588°E         | Cameroon          | Ecotone        | 28.3                | 8               |
| 15. Wakwa            | 7.271°N         | 13.526°E         | Cameroon          | Ecotone        | 18.2                | 5               |
| 16. Ngaoundaba       | 7.133°N         | 13.698°E         | Cameroon          | Ecotone        | 28.0                | 5               |
| 17. Meiganga         | 6.517°N         | 14.300°E         | Cameroon          | Ecotone        | 17.6                | 6               |
| 18. Betare Oya       | 5.563°N         | 14.091°E         | Cameroon          | Ecotone        | 28.3                | 13              |

\* Sites are used in weighted regressions of morphological traits on percent tree cover, but not for comparisons of morphological divergence between rainforest and ecotone habitats between West and Central Africa.
