# Supplementary material for: Human Impacts Flatten Rainforest-Savanna Gradient and Reduce Adaptive Diversity in a Rainforest Bird
Source: PubMed Central journal article supplement (PMC2948002; doi:10.1371/journal.pone.0013088), 2010-09-30
Supplement: pone.0013088.s004.pdf [file pone.0013088.s004.pdf]

**Table S3.** Historical specimens of *A. virens* measured at the Natural History Museum at Tring, United Kingdom.

| Catalogue #     | Year Collected | Locality             | Country            | Source |
|-----------------|----------------|----------------------|--------------------|--------|
| 1902.7.15.5     | 1901           | Efulen               | Cameroon           | 1,2    |
| 1904.7.18.118   | 1904           | Efulen               | Cameroon           | 1,2    |
| 1905.1.24.131   | 1904           | Dja River            | Cameroon           | 1      |
| 1905.1.24.126   | 1904           | Dja River            | Cameroon           | 1      |
| 1906.12.14.93   | 1905           | Efulen               | Cameroon           | 1,2    |
| 1906.12.14.90   | 1905           | Efulen               | Cameroon           | 1,2    |
| 1906.12.14.94   | 1905           | Efulen               | Cameroon           | 1,2    |
| 1911.5.31.270   | 1905           | Bitye                | Cameroon           | 1      |
| 1911.5.31.271   | 1907           | Bitye                | Cameroon           | 1      |
| 1969.44.56      | 1907           | Bitye                | Cameroon           | 1      |
| 1920.6.26.406   | 1908           | Assobam, Bumba River | Cameroon           | 3      |
| 1920.6.26.407   | 1908           | Assobam, Bumba River | Cameroon           | 3      |
| 1924.11.2.137   | 1922           | Bitye                | Cameroon           | 1      |
| 1911.12.23.1632 | 1900           | Prahsu               | Gold Coast (Ghana) | 4,5    |
| 1936.2.21.308   | 1900           | Prahsu               | Gold Coast (Ghana) | 4,5    |
| 1911.11.18.124  | 1910           | Sekondi              | Gold Coast (Ghana) | 4,6    |
| 1934.3.16.502   | 1934           | Goaso, Ashanti       | Gold Coast (Ghana) | 4,7    |
| 1934.3.16.504   | 1934           | Goaso, Ashanti       | Gold Coast (Ghana) | 4,7    |
| 1934.3.16.506   | 1934           | Mampong, Ashanti     | Gold Coast (Ghana) | 4,7    |
| 1858.1.4.109    | 1858           | Ashanti              | Gold Coast (Ghana) | 7      |
| 1876.5.23.606   | 1876           | Fantee               | Gold Coast (Ghana) | 8,9    |
| 1876.5.23.643   | 1876           | Fantee               | Gold Coast (Ghana) | 8,9    |
| 1876.5.23.646   | 1876           | Fantee               | Gold Coast (Ghana) | 8,9    |
| 1876.5.23.338   | 1876           | Fantee               | Gold Coast (Ghana) | 8,9    |
| 1876.5.23.645   | 1876           | Fantee               | Gold Coast (Ghana) | 8,9    |
| 1876.5.23.604   | 1876           | Fantee               | Gold Coast (Ghana) | 8,9    |
| 1895.5.1.718    | 1895           | Fantee               | Gold Coast (Ghana) | 8,9    |
| 1895.5.1.715    | 1895           | Fantee               | Gold Coast (Ghana) | 8,9    |
| 1895.5.1.714    | 1895           | Denkera              | Gold Coast (Ghana) | 8,9    |
| 1911.11.18.126  | 1911           | Nanna Kru            | Liberia            | 6      |
| 99.8.10.27      | 1893           | Grand Cape           | Liberia            | 4      |
| 1930.12.3.290   | 1930           | Kankordu             | Sierra Leone       | 10     |
| 1930.12.3.289   | 1930           | Sandaru              | Sierra Leone       | 10     |

- 1 Louette, M (1981) The birds of Cameroon: an annotated checklist. *Verhandl Kon Acad Wetensch Lett Schone Kunst Belg* 43: 1–295.
- 2 Sharpe RB (1902) On a small collection of birds from Efulen in Cameroon, West Africa. *Ibis* 44: 89–96.
- 3 Ogilvie-Grant WR (1917) VI.—Remarks on some recent collections of birds made by Mr. G. L. Bates in Cameroon. *Ibis* 59: 72–90.
- 4 Online gazetteer.
- 5 Alexander B (1902) XIX.—On the birds of the Gold Coast colony and its hinterland. *Ibis* 44: 278–333.

*Table S3 (continued)*

- 6 Bannerman DA (1912) X.—On a collection of birds made by Willoughby P. Lowe on the west coast of Africa and outlying islands; with field-notes by the collector. *Ibis* 54: 219–268.
- 7 Lowe WP (1937) XVII.—Report on the Lowe-Waldron expeditions to the Ashanti forests and northern territories of the Gold Coast. *Ibis* 79: 345–368.
- 8 Sharpe RB (1869) On a Collection of Birds from the Fantee Country in Western Africa. *Ibis* 11: 186–195.
- 9 Sharpe RB, Ussher HT (1872) XXIII.—Three new Species of Birds from the Fantee Country. *Ibis* 14: 181–183.
- 10 Bannerman DA (1931) XLII.—Accounts of birds collected (i.) by Mr. G. L. Bates on behalf of the British Museum in Sierra Leone and French Guinea; (ii) by Lt.-Col. G. J. Houghton, R. A. M. C., in Sierra Leone, recently acquired by the British Museum. *Ibis* 73: 661–697.
