# Supplementary material for: Human Impacts Flatten Rainforest-Savanna Gradient and Reduce Adaptive Diversity in a Rainforest Bird
Source: PubMed Central journal article supplement (PMC2948002; doi:10.1371/journal.pone.0013088), 2010-09-30

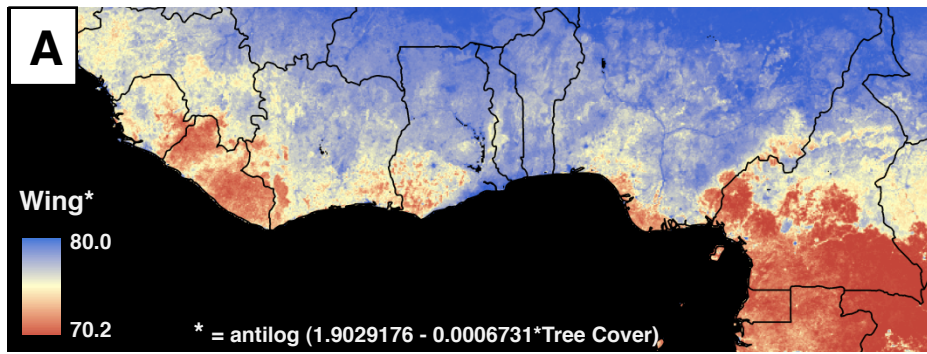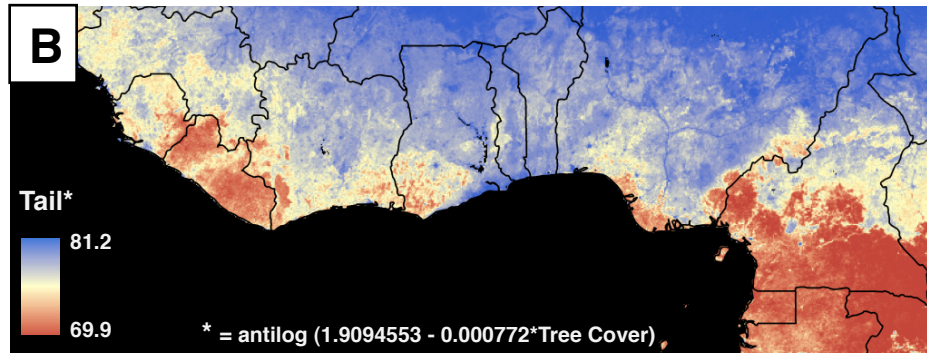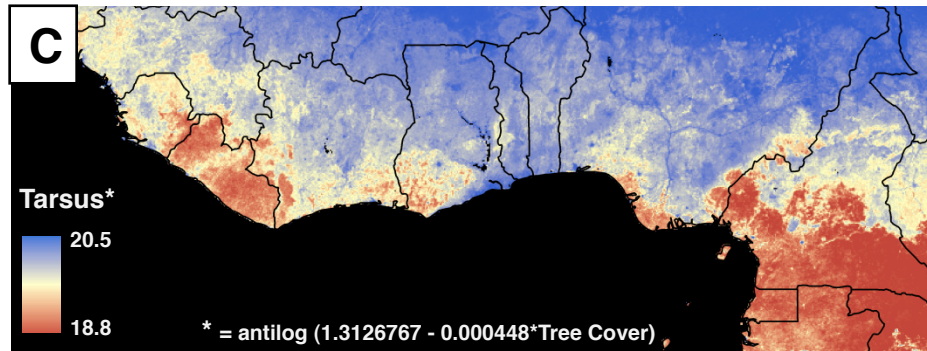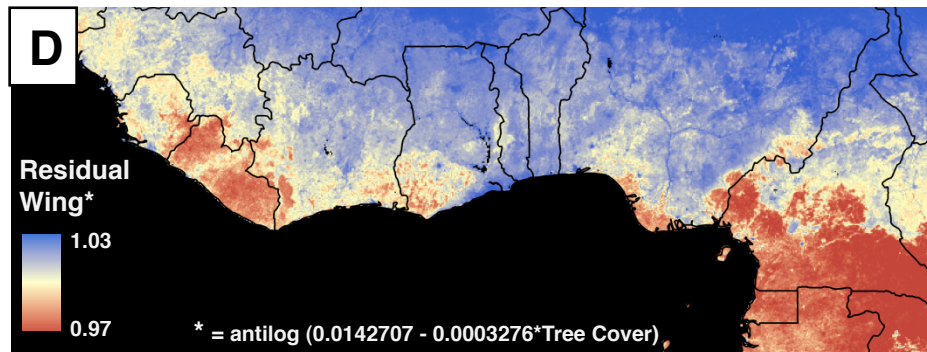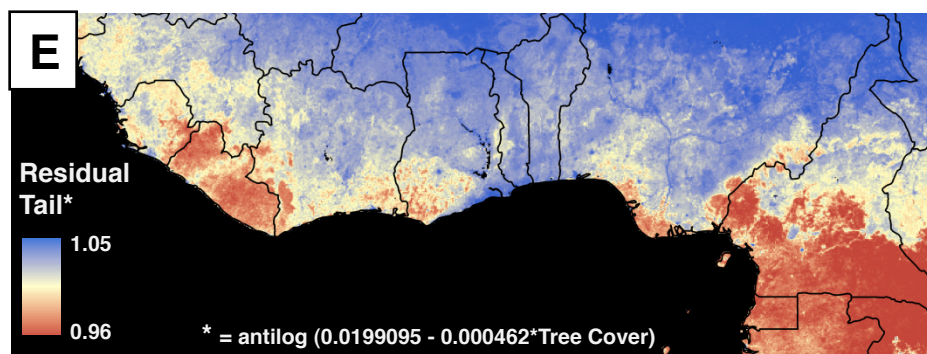

Supplement: pone.0013088.s005.pdf [file pone.0013088.s005.pdf]
